# Supplementary material for: A combination of β-cyclodextrin functionalized magnetic graphene oxide nanoparticles with β-cyclodextrin-based sensor for highly sensitive and selective voltammetric determination of tetracycline and doxycycline in milk samples
Source: Royal Society of Chemistry journal article supplement (doi:10.1039/c6ra03787a), 2016-01-01
Supplement: c6ra03787a1.pdf [file c6ra03787a1.pdf]

## Supplementary materials

### Tables S1:

**S1. Wave numbers (cm<sup>-1</sup>) and their assignments of FTIR spectra for GO, MGONPs and β-CD-MGONP nanosorbents.**

| Peak assignment                                               | Wave numbers (cm <sup>-1</sup> ) |        |            |
|---------------------------------------------------------------|----------------------------------|--------|------------|
|                                                               | GO                               | MGONPs | β-CD-MGONP |
| Fe-O stretching vibration                                     | -                                | 550.3  | 554.3      |
| R-1, 4-bond skeleton vibration of β-CD                        | -                                | -      | 1027.2     |
| O-H stretching vibration of β-CD                              | -                                | -      | 3425       |
| O-H stretching vibration                                      | 3227.3                           | 3220.0 | 3425       |
| C=O stretching vibration peaks of carboxyl and carbonyl in GO | 1711.2 and 1400.2                |        |            |
| Aromatic C=C stretching vibration peaks of GO                 | 1583                             |        |            |
| C-O stretching vibration of epoxy and alkoxy groups in GO     | 1170.1 and 1121.4                |        |            |
